# Supplementary material for: A mobile phone application for the assessment and management of youth mental health problems in primary care: a randomised controlled trial
Source: Springer Nature journal article supplement (doi:10.1186/1471-2296-12-131), 2011-11-29
Supplement: 12875_2011_648_MOESM2_ESM.pdf [file 12875_2011_648_MOESM2_ESM.pdf]

Mean DASS Depression

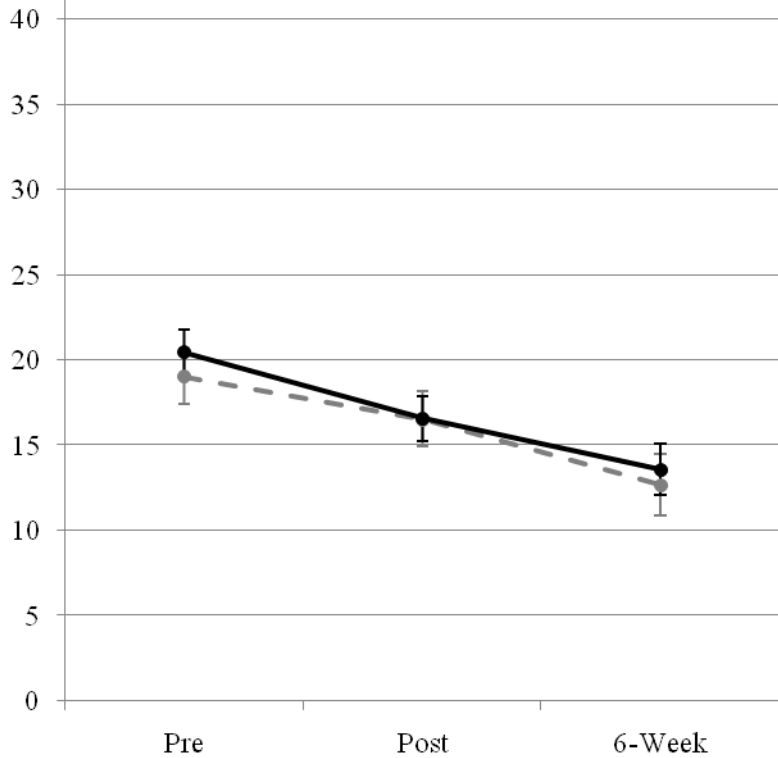

—●— Comparison  
—●— Intervention
